# Supplementary material for: UAV Thermal Images for Water Presence Detection in a Mediterranean Headwater Catchment
Source: MDPI journal article supplement (doi:10.3390/rs14010108), 2021-12-27
Supplement: s1 [file s1]

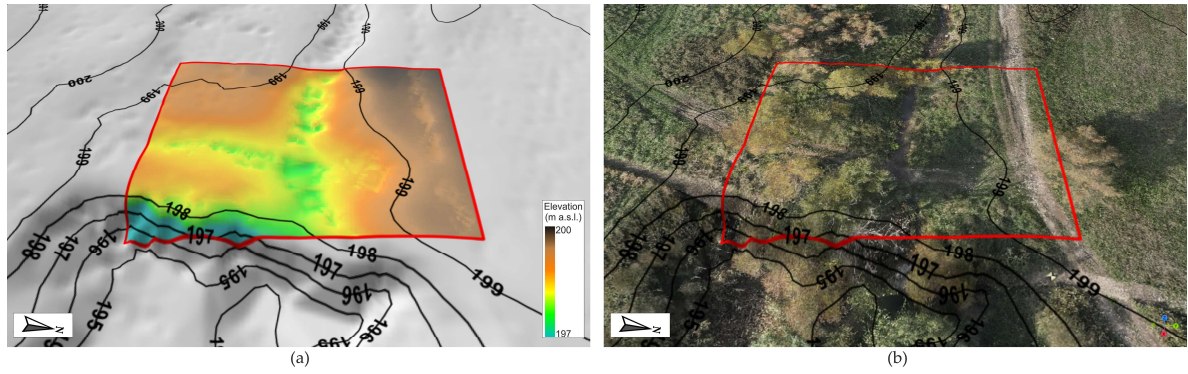

**Figure S1.** (a) Three-dimensional representation of a high-resolution (20 cm) Lidar-derived digital terrain model of the study area (red borders). (b) Overlay of the study area on Lidar-derived high-resolution orthophoto. Elevation is represented by black contour lines.

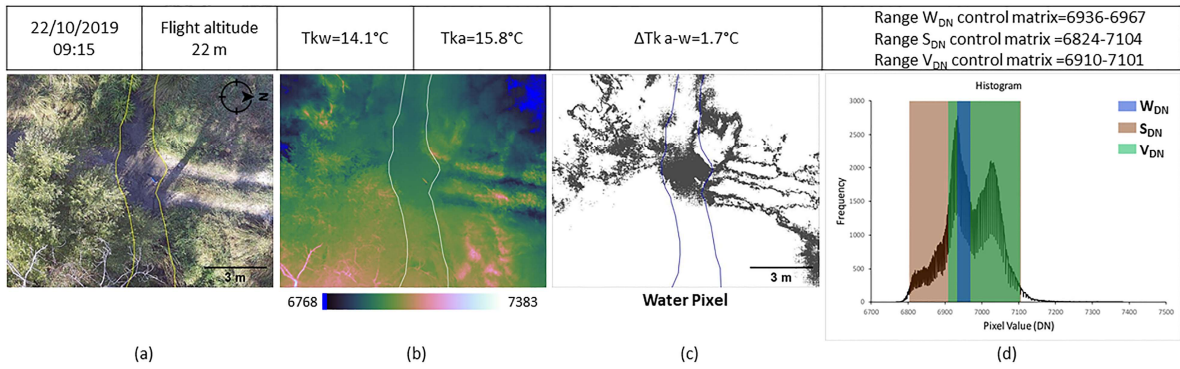

**Figure S2.** Surveys performed on 22 October 2019 at 09:15, 22 m flight altitude, the following images are shown: RGB image, with the delimitation of the geomorphic channel (a); the corresponding IR thermal image in false color, with the delimitation of the geomorphic channel (b); the pixels within the WDN range (c); the frequency distributions of the DN values of the thermal images, with three bands highlighting the WDN, SDN, and VDN ranges (d). Furthermore, information is provided about the date, time, and height of the flight; T<sub>ka</sub>, T<sub>kw</sub>, and ΔT<sub>k a-w</sub>; and minimum and maximum values of the WDN, SDN, and VDN ranges.

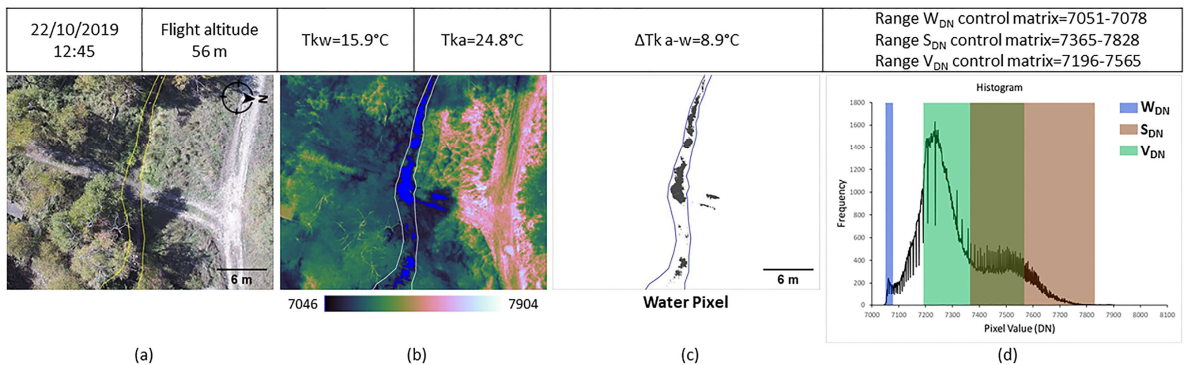

**Figure S3.** Surveys performed on 22 October 2019 at 12:45, 56 m flight altitude, the following images are shown: RGB image, with the delimitation of the geomorphic channel (a); the corresponding IR thermal image in false color, with the delimitation of the geomorphic channel (b); the pixels within the WDN range (c); the frequency distributions of the DN values of the thermal

images, with three bands highlighting the WDN, SDN, and VDN ranges (**d**). Furthermore, information is provided about the date, time, and height of the flight; Tka, Tkw, and  $\Delta T_k$  a-w; and minimum and maximum values of the WDN, SDN, and VDN ranges.

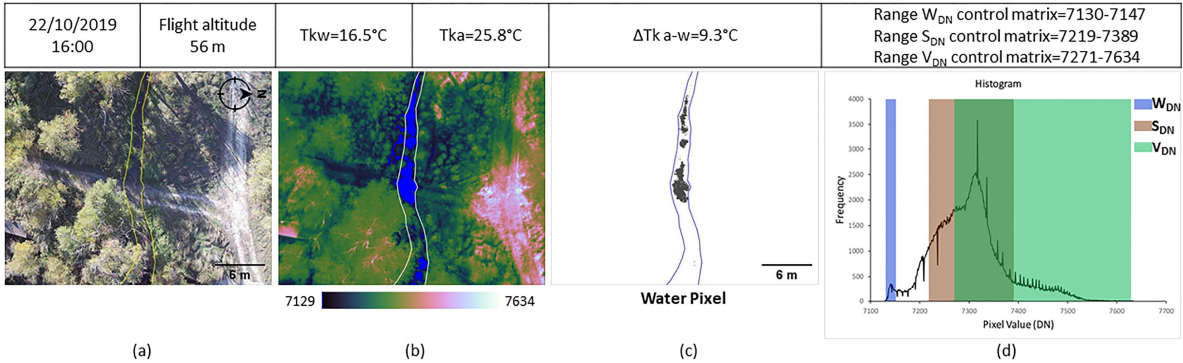



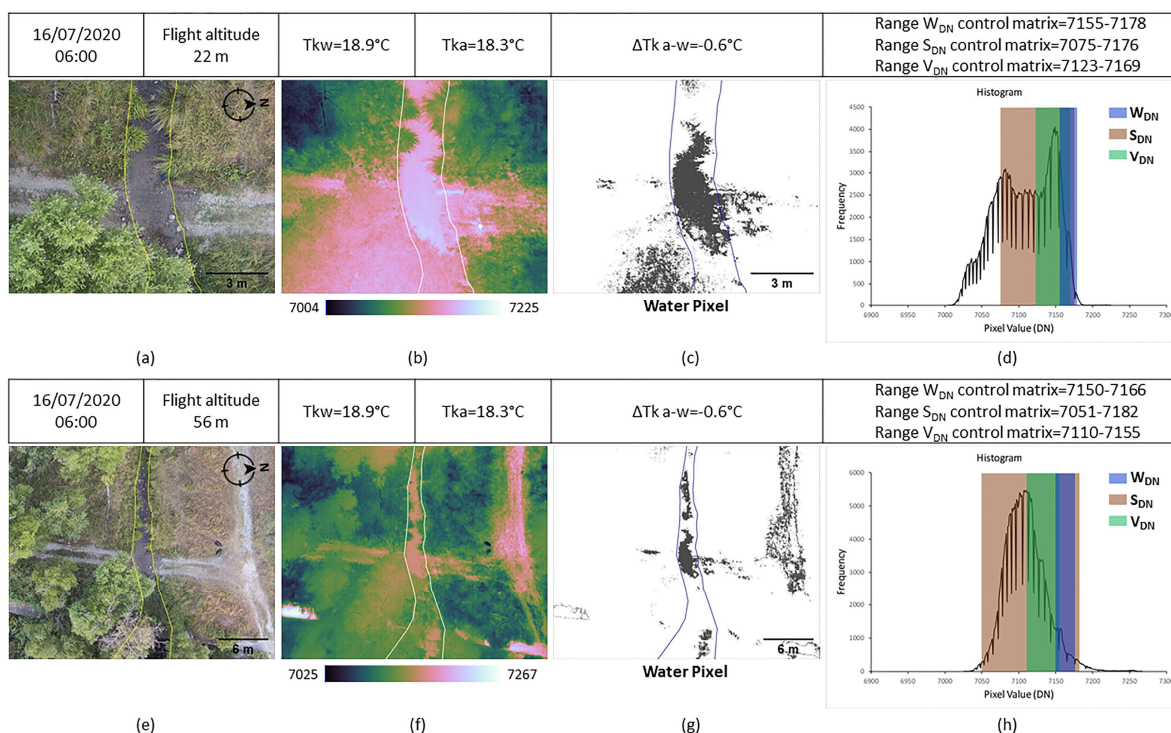

**Figure S6.** Surveys performed on 16 July 2020 at 06:00, 22 m and 56 m flight altitude, the following images are shown: RGB image, with the delimitation of the geomorphic channel (a,e); the corresponding IR thermal image in false color, with the delimitation of the geomorphic channel (b,f); the pixels within the WDN range (c,g); the frequency distributions of the DN values of the thermal images, with three bands highlighting the WDN, SDN, and VDN ranges (d,h). Furthermore, information is provided about the date, time, and height of the flight; Tka, Tkw, and  $\Delta T_k a-w$ ; and minimum and maximum values of the WDN, SDN, and VDN ranges.

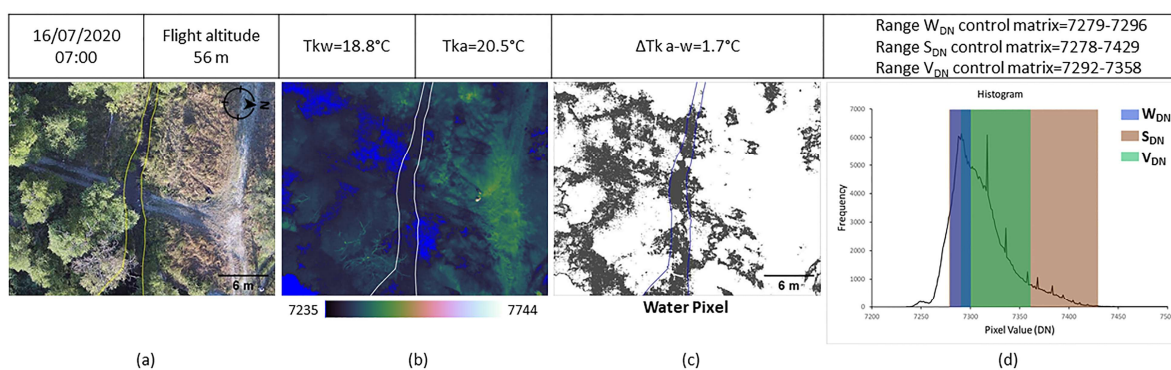

**Figure S7.** Surveys performed on 16 July 2020 at 07:00, 56 m flight altitude, the following images are shown: RGB image, with the delimitation of the geomorphic channel (a); the corresponding IR thermal image in false color, with the delimitation of the geomorphic channel (b); the pixels within the WDN range (c); the frequency distributions of the DN values of the thermal images, with three bands highlighting the WDN, SDN, and VDN ranges (d). Furthermore, information is provided about the date, time, and height of the flight; Tka, Tkw, and  $\Delta T_k a-w$ ; and minimum and maximum values of the WDN, SDN, and VDN ranges.

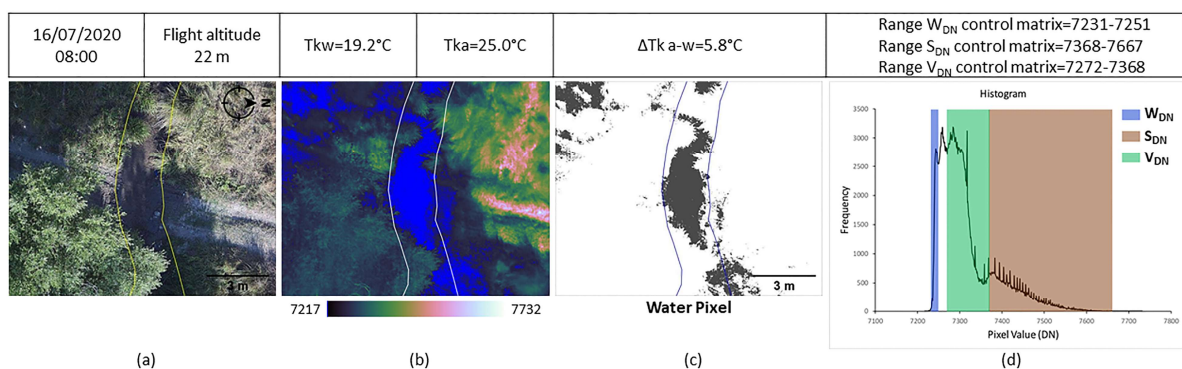

**Figure S8.** Surveys performed on 16 July 2020 at 08:00, 22 m flight altitude, the following images are shown: RGB image, with the delimitation of the geomorphic channel (a); the corresponding IR thermal image in false color, with the delimitation of the geomorphic channel (b); the pixels within the WDN range (c); the frequency distributions of the DN values of the thermal images, with three bands highlighting the WDN, SDN, and VDN ranges (d). Furthermore, information is provided about the date, time, and height of the flight; Tka, Tkw, and  $\Delta T_k a-w$ ; and minimum and maximum values of the WDN, SDN, and VDN ranges.

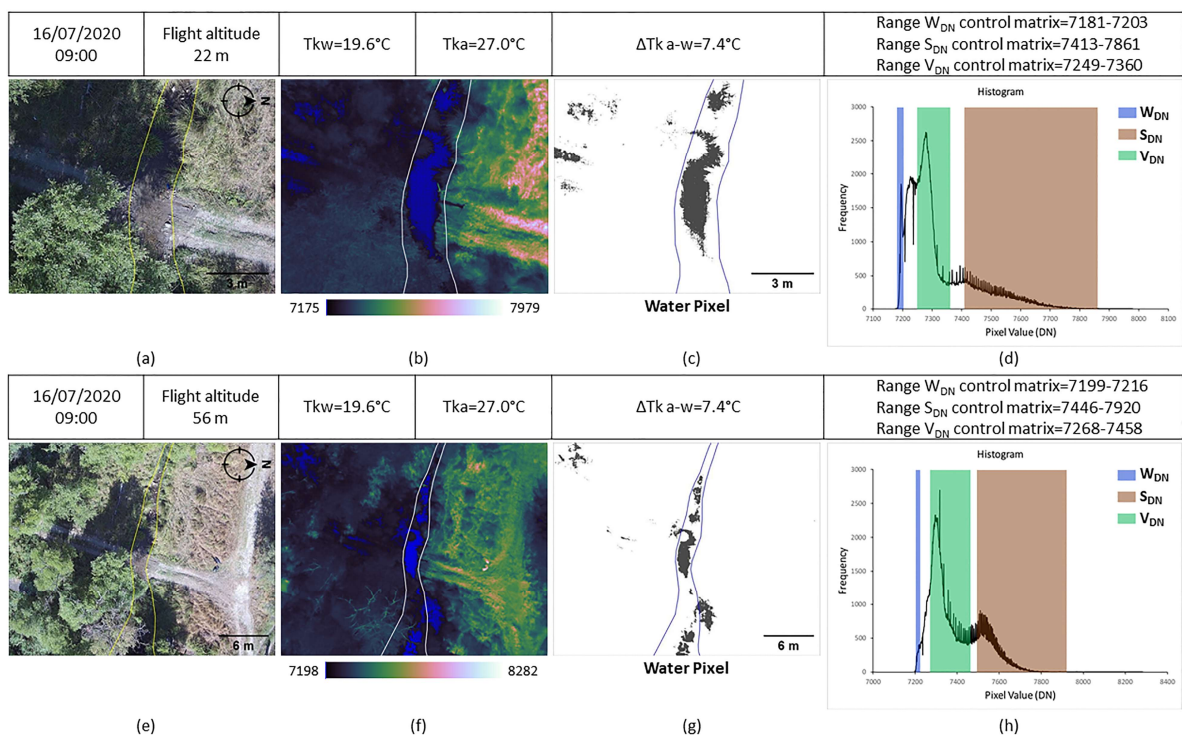

**Figure S9.** Surveys performed on 16 July 2020 at 09:00, 22 m and 56 m flight altitude, the following images are shown: RGB image, with the delimitation of the geomorphic channel (a,e); the corresponding IR thermal image in false color, with the delimitation of the geomorphic channel (b,f); the pixels within the WDN range (c,g); the frequency distributions of the DN values of the thermal images, with three bands highlighting the WDN, SDN, and VDN ranges (d,h). Furthermore, information is provided about the date, time, and height of the flight; Tka, Tkw, and  $\Delta T_k a-w$ ; and minimum and maximum values of the WDN, SDN, and VDN ranges.



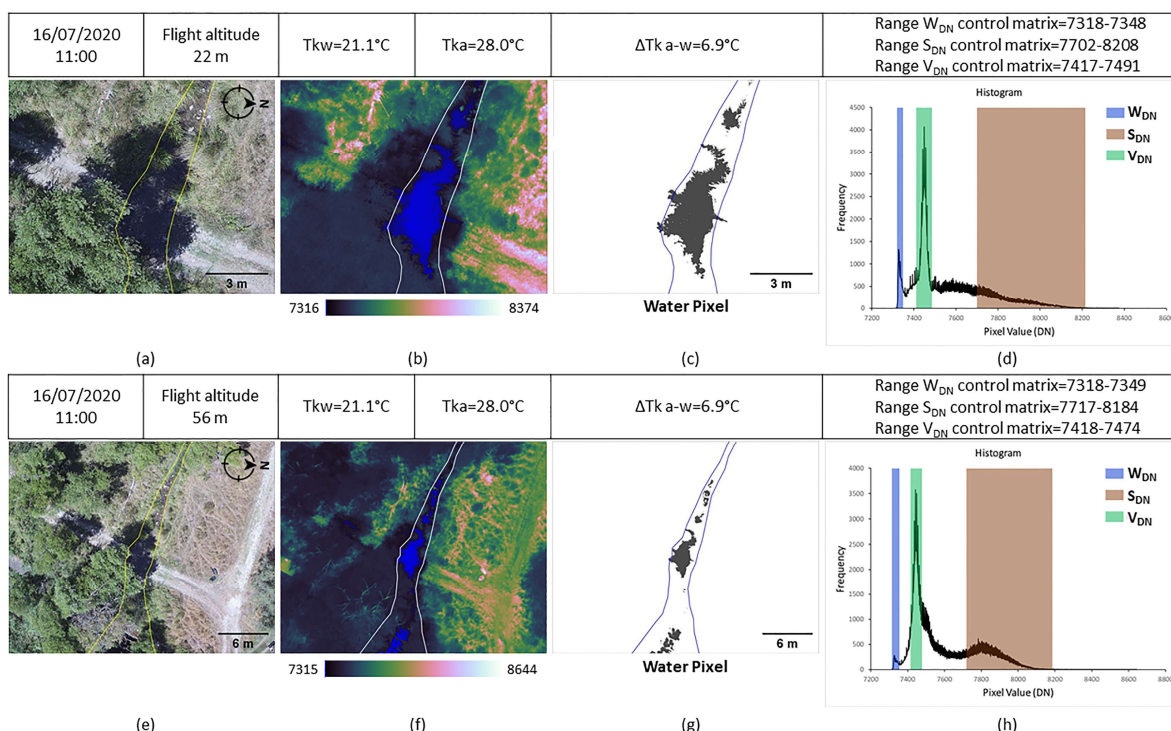

**Figure S10.** Surveys performed on 16 July 2020 at 11:00, 22 m and 56 m flight altitude, the following images are shown: RGB image, with the delimitation of the geomorphic channel (a,e); the corresponding IR thermal image in false color, with the delimitation of the geomorphic channel (b,f); the pixels within the WDN range (c,g); the frequency distributions of the DN values of the thermal images, with three bands highlighting the WDN, SDN, and VDN ranges (d,h). Furthermore, information is provided about the date, time, and height of the flight; Tka, Tkw, and  $\Delta T_k a-w$ ; and minimum and maximum values of the WDN, SDN, and VDN ranges.

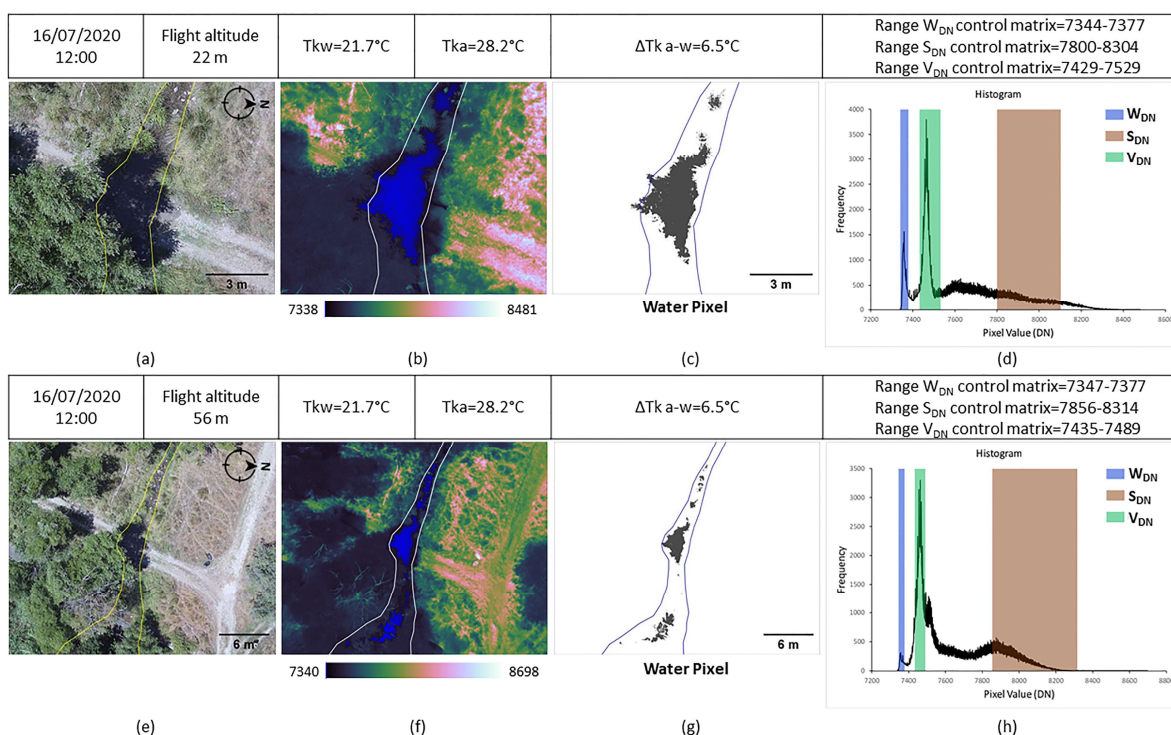

**Figure S11.** Surveys performed on 16 July 2020 at 12:00, 22 m and 56 m flight altitude, the following images are shown: RGB image, with the delimitation of the geomorphic channel (a,e); the

corresponding IR thermal image in false color, with the delimitation of the geomorphic channel (b,f); the pixels within the WDN range (c,g); the frequency distributions of the DN values of the thermal images, with three bands highlighting the WDN, SDN, and VDN ranges (d,h). Furthermore, information is provided about the date, time, and height of the flight; Tka, Tkw, and  $\Delta T_k a-w$ ; and minimum and maximum values of the WDN, SDN, and VDN ranges.

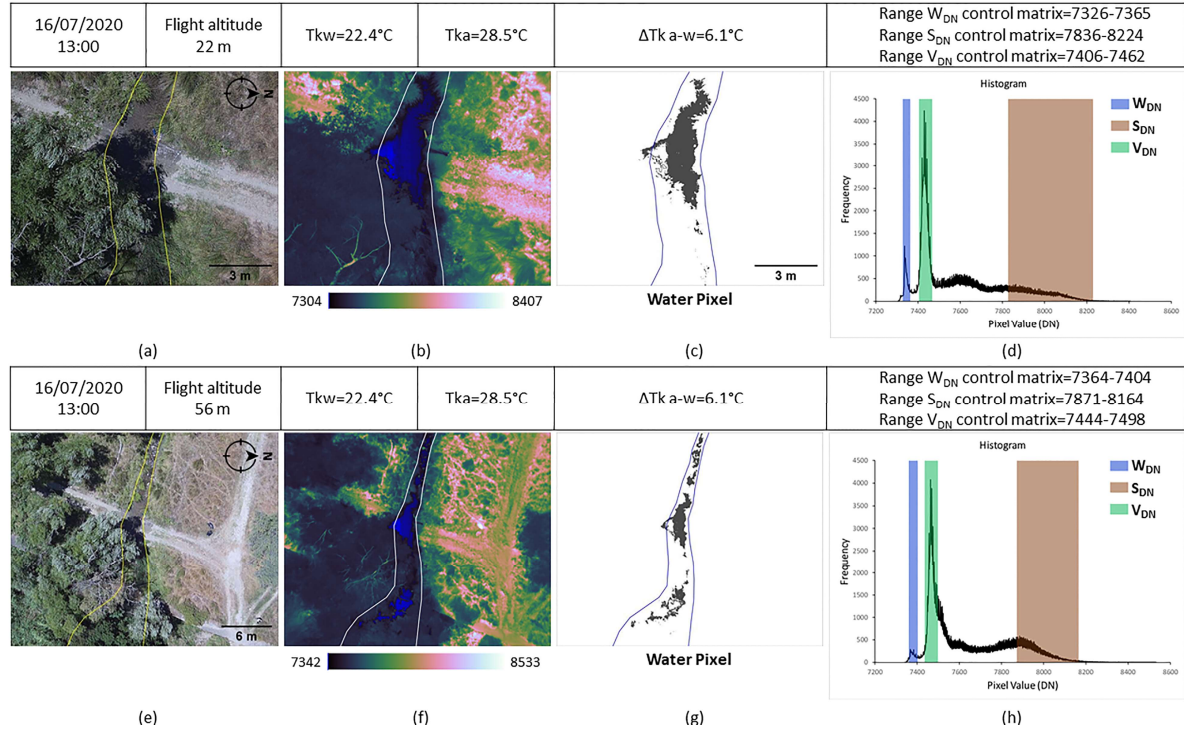

**Figure S12.** Surveys performed on 16 July 2020 at 13:00, 22 m and 56 m flight altitude, the following images are shown: RGB image, with the delimitation of the geomorphic channel (a,e); the corresponding IR thermal image in false color, with the delimitation of the geomorphic channel (b,f); the pixels within the WDN range (c,g); the frequency distributions of the DN values of the thermal images, with three bands highlighting the WDN, SDN, and VDN ranges (d,h). Furthermore, information is provided about the date, time, and height of the flight; Tka, Tkw, and  $\Delta T_k a-w$ ; and minimum and maximum values of the WDN, SDN, and VDN ranges.

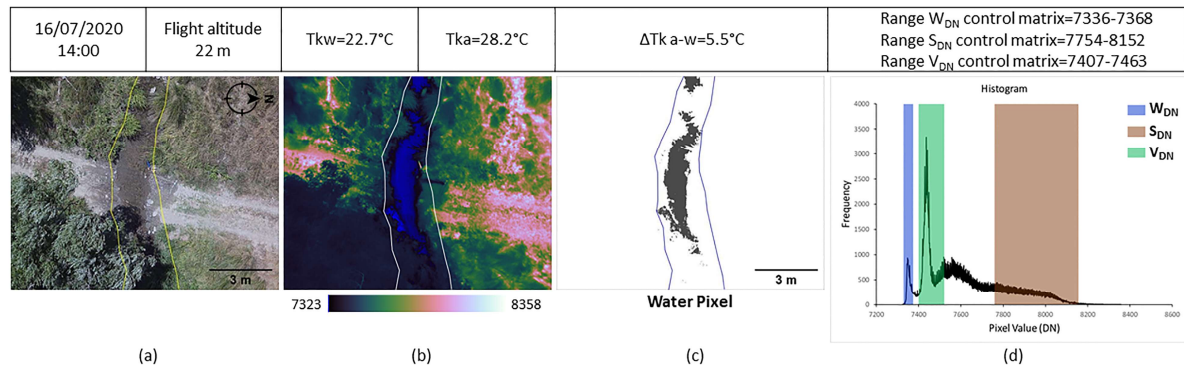

**Figure S13.** Surveys performed on 16 July 2020 at 16:00, 22 m flight altitude, the following images are shown: RGB image, with the delimitation of the geomorphic channel (a); the corresponding IR thermal image in false color, with the delimitation of the geomorphic channel (b); the pixels within the WDN range (c); the frequency distributions of the DN values of the thermal images, with three

bands highlighting the WDN, SDN, and VDN ranges (**d**). Furthermore, information is provided about the date, time, and height of the flight;  $T_{ka}$ ,  $T_{kw}$ , and  $\Delta T_{k\ a-w}$ ; and minimum and maximum values of the WDN, SDN, and VDN ranges.
