# Supplementary material for: UAV Thermal Images for Water Presence Detection in a Mediterranean Headwater Catchment
Source: MDPI journal article supplement (doi:10.3390/rs14010108), 2021-12-27
Supplement: s1 [file s1]

Table S2. Results summary.

| Date       | Time  | Flight hight<br>(m) | Tka (°C) | Tkw (°C) | ΔTk a/w (°C) | Rs (W m <sup>-2</sup> ) | ETacc (mm) | Humidity (%) | Wind (m/s) | Image sets | NO | NO <sup>TD</sup> | NO <sup>TD-FD</sup> | O <sup>TD-FD</sup> |
|------------|-------|---------------------|----------|----------|--------------|-------------------------|------------|--------------|------------|------------|----|------------------|---------------------|--------------------|
| 22/10/2019 | 09:15 | 22                  | 15.8     | 14.1     | 1.7          | 417                     | 0.6        | 90           | 1          | 6          |    |                  |                     | •                  |
|            |       | 56                  |          |          |              |                         |            |              |            |            |    |                  |                     | •                  |
|            | 12:45 | 22                  | 24.8     | 15.9     | 8.9          | 635                     | 2.4        | 48           | 3.1        |            |    | •                |                     |                    |
|            |       | 56                  |          |          |              |                         |            |              |            |            |    | •                |                     |                    |
|            | 16:00 | 22                  | 25.8     | 16.5     | 9.3          | 198                     | 3.38       | 38           | 3.6        |            | •  |                  |                     |                    |
|            |       | 56                  |          |          |              |                         |            |              |            |            | •  |                  |                     |                    |
| 15/02/2020 | 07:30 | 22                  | 8.1      | 7.6      | 0.5          | 113                     | 0.25       | 69           | 2.4        | 4          |    |                  |                     | •                  |
|            |       | 56                  |          |          |              |                         |            |              |            |            |    |                  |                     | •                  |
|            | 15:30 | 22                  | 16       | 10.8     | 5.2          | 295                     | 2.66       | 41           | 4.4        |            |    |                  |                     | •                  |
|            |       | 56                  |          |          |              |                         |            |              |            |            |    |                  | •                   |                    |
| 16/07/2020 | 06:00 | 22                  | 18.3     | 18.9     | -0.6         | 135                     | 0.34       | 86           | 1.8        | 9          |    |                  |                     | •                  |
|            |       | 56                  |          |          |              |                         |            |              |            |            |    |                  |                     | •                  |
|            | 07:00 | 22                  | 20.5     | 18.8     | 1.7          | 325                     | 0.55       | 78           | 2.1        |            |    |                  |                     | •                  |
|            |       | 56                  |          |          |              |                         |            |              |            |            |    |                  |                     | •                  |
|            | 08:00 | 22                  | 25       | 19.2     | 5.8          | 527                     | 0.93       | 64           | 1.3        |            |    |                  | •                   |                    |
|            |       | 56                  |          |          |              |                         |            |              |            |            |    |                  | •                   |                    |
|            | 09:00 | 22                  | 27       | 19.6     | 7.4          | 700                     | 1.47       | 46           | 2          |            |    |                  | •                   |                    |
|            |       | 56                  |          |          |              |                         |            |              |            |            |    |                  | •                   |                    |
|            | 10:00 | 22                  | 27.6     | 20.4     | 7.2          | 842                     | 2.09       | 45           | 4.3        |            | •  |                  |                     | •                  |
|            |       | 56                  |          |          |              |                         |            |              |            |            |    |                  | •                   |                    |
|            | 11:00 | 22                  | 28       | 21.1     | 6.9          | 939                     | 2.79       | 47           | 4.6        |            | •  |                  |                     |                    |
|            |       | 56                  |          |          |              |                         |            |              |            |            | •  |                  |                     |                    |
|            | 12:00 | 22                  | 28.2     | 21.7     | 6.5          | 1001                    | 3.53       | 44           | 7.5        |            | •  |                  |                     |                    |
|            |       | 56                  |          |          |              |                         |            |              |            |            | •  |                  |                     |                    |
|            | 13:00 | 22                  | 28.5     | 22.4     | 6.1          | 987                     | 4.27       | 44           | 8.5        |            | •  |                  |                     |                    |
|            |       | 56                  |          |          |              |                         |            |              |            |            | •  |                  |                     |                    |
|            | 14:00 | 22                  | 28.2     | 22.7     | 5.5          | 915                     | 4.97       | 42           | 9.1        |            | •  |                  |                     |                    |
|            |       | 56                  |          |          |              |                         |            |              |            |            | •  |                  |                     |                    |

|  |  |  |  |  |  |  |  |  |       |      |        |       |        |        |
|--|--|--|--|--|--|--|--|--|-------|------|--------|-------|--------|--------|
|  |  |  |  |  |  |  |  |  | Total | 28   | 11     | 2     | 6      | 9      |
|  |  |  |  |  |  |  |  |  |       | 100% | 39.29% | 7.14% | 21.43% | 32.14% |

- NO
- W<sub>DN</sub> not overlapped with other DN ranges
- NO<sup>TD</sup>
- W<sub>DN</sub> not overlapped with other DN ranges, with true detection outside the channel
- NO<sup>TD-FD</sup>
- W<sub>DN</sub> not overlapped with other DN ranges, with true and false detections outside the channel
- O<sup>TD-FD</sup>
- W<sub>DN</sub> overlapped with other DN ranges, with true and false detections outside the channel
