# Supplementary material for: UAV Thermal Images for Water Presence Detection in a Mediterranean Headwater Catchment
Source: MDPI journal article supplement (doi:10.3390/rs14010108), 2021-12-27
Supplement: s1 [file s1]

**Table S1.** Weather conditions during flight days (data from the Fitterizzi weather station). Highlighted lines refer to the hours when the flights are performed.

| Date       | CET Time | Temperature (°C) | Humidity (%) | Wind (m/s) | Rs (W m <sup>-2</sup> ) | Rain previous days     |
|------------|----------|------------------|--------------|------------|-------------------------|------------------------|
| 22/10/2019 | 00:00    | 11.2             | 97           | 1.4        | 0                       | 2.4 mm (6 days before) |
|            | 01:00    | 10.5             | 99           | 1.4        | 0                       |                        |
|            | 02:00    | 10.4             | 99           | 1.5        | 0                       |                        |
|            | 03:00    | 10.2             | 99           | 1.4        | 0                       |                        |
|            | 04:00    | 10.1             | 99           | 1.4        | 0                       |                        |
|            | 05:00    | 9.2              | 99           | 1.3        | 0                       |                        |
|            | 06:00    | 9.1              | 99           | 1.3        | 0                       |                        |
|            | 07:00    | 10.5             | 99           | 1.1        | 74                      |                        |
|            | 08:00    | 14.9             | 97           | 1          | 247                     |                        |
|            | 09:00    | 19.3             | 72           | 1.7        | 417                     |                        |
|            | 10:00    | 22.4             | 61           | 2.2        | 561                     |                        |
|            | 11:00    | 24.1             | 54           | 2.7        | 655                     |                        |
|            | 12:00    | 25               | 45           | 3.1        | 685                     |                        |
|            | 13:00    | 26.3             | 39           | 3.6        | 635                     |                        |
|            | 14:00    | 26.3             | 38           | 3.8        | 539                     |                        |
|            | 15:00    | 25.8             | 39           | 4          | 385                     |                        |
|            | 16:00    | 25               | 38           | 3.6        | 198                     |                        |
|            | 17:00    | 18.9             | 64           | 1.2        | 0                       |                        |
|            | 18:00    | 15.5             | 78           | 2.3        | 0                       |                        |
|            | 19:00    | 13.4             | 76           | 2.1        | 0                       |                        |
|            | 20:00    | 11.8             | 77           | 1.5        | 0                       |                        |
|            | 21:00    | 11.4             | 74           | 1.8        | 0                       |                        |
|            | 22:00    | 10.7             | 79           | 1.8        | 0                       |                        |
|            | 23:00    | 11.2             | 78           | 1.8        | 0                       |                        |
| 15/02/2020 | 00:00    | 3.8              | 99           | 2.6        | 0                       | 11.8 mm (1 day before) |
|            | 01:00    | 6.2              | 97           | 2.9        | 0                       |                        |
|            | 02:00    | 6                | 89           | 2.9        | 0                       |                        |
|            | 03:00    | 6.6              | 85           | 2.8        | 0                       |                        |
|            | 04:00    | 6.2              | 84           | 2.4        | 0                       |                        |
|            | 05:00    | 6.9              | 80           | 3          | 0                       |                        |
|            | 06:00    | 6.2              | 80           | 2.8        | 0                       |                        |
|            | 07:00    | 6.9              | 73           | 2.6        | 0                       |                        |
|            | 08:00    | 9.4              | 65           | 2.1        | 113                     |                        |
|            | 09:00    | 13               | 56           | 1.6        | 333                     |                        |
|            | 10:00    | 14.6             | 42           | 2.4        | 499                     |                        |
|            | 11:00    | 15               | 37           | 3.4        | 620                     |                        |
|            | 12:00    | 14.9             | 39           | 5.1        | 685                     |                        |
|            | 13:00    | 15.6             | 36           | 4.6        | 689                     |                        |
|            | 14:00    | 15.8             | 40           | 5.3        | 611                     |                        |
|            | 15:00    | 16               | 40           | 4.6        | 472                     |                        |
|            | 16:00    | 15.4             | 42           | 4.2        | 295                     |                        |
|            | 17:00    | 12.9             | 53           | 3.3        | 13                      |                        |
|            | 18:00    | 8.7              | 71           | 2.7        | 0                       |                        |
|            | 19:00    | 8.2              | 72           | 2.4        | 0                       |                        |
|            | 20:00    | 8.2              | 71           | 2.8        | 0                       |                        |
|            | 21:00    | 7.3              | 75           | 2.7        | 0                       |                        |
|            | 22:00    | 5.9              | 82           | 2          | 0                       |                        |
|            | 23:00    | 5.7              | 86           | 2.6        | 0                       |                        |
| 16/07/2020 | 00:00    | 20.9             | 78           | 1.8        | 0                       | 0.2 mm (9 days before) |
|            | 01:00    | 20.4             | 79           | 1.4        | 0                       |                        |
|            | 02:00    | 19.6             | 84           | 1.8        | 0                       |                        |
|            | 03:00    | 20.5             | 78           | 1.8        | 0                       |                        |
|            | 04:00    | 19.5             | 81           | 1.9        | 0                       |                        |
|            | 05:00    | 18.3             | 86           | 1.8        | 0                       |                        |
|            | 06:00    | 20.5             | 78           | 2.1        | 135                     |                        |
|            | 07:00    | 25               | 64           | 1.3        | 325                     |                        |
|            | 08:00    | 27               | 46           | 2          | 527                     |                        |
|            | 09:00    | 27.6             | 45           | 4.3        | 700                     |                        |
|            | 10:00    | 28               | 47           | 4.6        | 842                     |                        |
|            | 11:00    | 28.2             | 44           | 7.5        | 939                     |                        |
|            | 12:00    | 28.5             | 44           | 8.5        | 1001                    |                        |
|            | 13:00    | 28.2             | 42           | 9.1        | 987                     |                        |
|            | 14:00    | 28               | 43           | 10         | 915                     |                        |
|            | 15:00    | 27.3             | 48           | 11.2       | 797                     |                        |
|            | 16:00    | 26.8             | 48           | 12.2       | 634                     |                        |
|            | 17:00    | 26.2             | 47           | 10.5       | 433                     |                        |
|            | 18:00    | 25.3             | 54           | 10.1       | 218                     |                        |
|            | 19:00    | 24.3             | 55           | 9.6        | 0                       |                        |
|            | 20:00    | 23.7             | 58           | 9.4        | 0                       |                        |
|            | 21:00    | 22.7             | 63           | 3.2        | 0                       |                        |
|            | 22:00    | 21.1             | 67           | 1.9        | 0                       |                        |
|            | 23:00    | 19.5             | 73           | 1.6        | 0                       |                        |
